# Supplementary material for: Association of Maternal Smoking during Pregnancy with Neurophysiological and ADHD-Related Outcomes in School-Aged Children
Source: MDPI journal article supplement (doi:10.3390/ijerph20064716), 2023-03-07
Supplement: s1 [file s1]

## Supplement/Additional Results

**Table S1:** Brain activity descriptive characteristics for EEG resting-state conditions.

|                    |           | Overall<br>N=142 |           | Exposed<br>n=26 |           | Not exposed<br>n=116 |           |          |
|--------------------|-----------|------------------|-----------|-----------------|-----------|----------------------|-----------|----------|
| <b>Eyes Closed</b> |           | <i>M</i>         | <i>SD</i> | <i>M</i>        | <i>SD</i> | <i>M</i>             | <i>SD</i> | <i>p</i> |
| Delta              | Frontal   | 6,52             | 2,23      | 6,47            | 2,12      | 6,53                 | 2,27      | .906     |
|                    | Central   | 3,33             | 1,19      | 3,38            | 1,41      | 3,32                 | 1,14      | .804     |
|                    | Posterior | 3,27             | 1,31      | 3,45            | 1,54      | 3,23                 | 1,26      | .455     |
|                    | Overall   | 4,47             | 1,41      | 4,53            | 1,55      | 4,46                 | 1,39      | .809     |
| Theta              | Frontal   | 1,53             | 0,72      | 1,36            | 0,74      | 1,57                 | 0,71      | .200     |
|                    | Central   | 1,15             | 0,56      | 1,04            | 0,44      | 1,18                 | 0,58      | .272     |
|                    | Posterior | 1,31             | 0,68      | 1,27            | 0,72      | 1,32                 | 0,67      | .718     |
|                    | Overall   | 1,35             | 0,61      | 1,24            | 0,62      | 1,37                 | 0,60      | .330     |
| Alpha              | Frontal   | 0,84             | 0,46      | 0,91            | 0,51      | 0,83                 | 0,46      | .434     |
|                    | Central   | 0,73             | 0,41      | 0,84            | 0,46      | 0,71                 | 0,40      | .132     |
|                    | Posterior | 1,45             | 0,89      | 1,74            | 1,11      | 1,39                 | 0,82      | .066     |
|                    | Overall   | 1,03             | 0,54      | 1,19            | 0,63      | 1,00                 | 0,51      | .153     |
| Beta               | Frontal   | 0,13             | 0,07      | 0,11            | 0,04      | 0,13                 | 0,07      | .014     |
|                    | Central   | 0,08             | 0,04      | 0,07            | 0,03      | 0,09                 | 0,05      | .011     |
|                    | Posterior | 0,09             | 0,04      | 0,08            | 0,04      | 0,09                 | 0,05      | .399     |
|                    | Overall   | 0,10             | 0,05      | 0,09            | 0,03      | 0,10                 | 0,05      | .024     |

|                  |           | Overall<br>N=142 |           | Exposed<br>n=26 |           | Not exposed<br>n=116 |           |          |
|------------------|-----------|------------------|-----------|-----------------|-----------|----------------------|-----------|----------|
| <b>Eyes open</b> |           | <i>M</i>         | <i>SD</i> | <i>M</i>        | <i>SD</i> | <i>M</i>             | <i>SD</i> | <i>p</i> |
| Delta            | Frontal   | 5,46             | 1,82      | 5,23            | 2,00      | 5,51                 | 1,78      | .473     |
|                  | Central   | 3,46             | 0,92      | 3,58            | 1,20      | 3,44                 | 0,85      | .561     |
|                  | Posterior | 3,45             | 1,18      | 3,55            | 1,56      | 3,43                 | 1,08      | .634     |
|                  | Overall   | 4,19             | 1,15      | 4,17            | 1,46      | 4,19                 | 1,07      | .950     |
| Theta            | Frontal   | 1,09             | 0,43      | 1,10            | 0,65      | 1,09                 | 0,37      | .952     |
|                  | Central   | 0,91             | 0,38      | 0,91            | 0,47      | 0,91                 | 0,36      | .934     |
|                  | Posterior | 0,88             | 0,38      | 0,87            | 0,44      | 0,89                 | 0,37      | .841     |
|                  | Overall   | 0,97             | 0,36      | 0,96            | 0,49      | 0,97                 | 0,33      | .950     |
| Alpha            | Frontal   | 0,46             | 0,21      | 0,49            | 0,23      | 0,46                 | 0,21      | .520     |
|                  | Central   | 0,45             | 0,25      | 0,53            | 0,29      | 0,43                 | 0,24      | .099     |
|                  | Posterior | 0,52             | 0,41      | 0,63            | 0,53      | 0,50                 | 0,38      | .162     |
|                  | Overall   | 0,48             | 0,27      | 0,55            | 0,32      | 0,47                 | 0,25      | .165     |
| Beta             | Frontal   | 0,16             | 0,08      | 0,14            | 0,05      | 0,17                 | 0,09      | .068     |
|                  | Central   | 0,10             | 0,05      | 0,09            | 0,03      | 0,10                 | 0,05      | .019     |
|                  | Posterior | 0,09             | 0,04      | 0,08            | 0,03      | 0,09                 | 0,04      | .272     |
|                  | Overall   | 0,12             | 0,05      | 0,10            | 0,03      | 0,12                 | 0,05      | .069     |

**Table S2:** Association of prenatal tobacco smoking of any severity with EEG brain activity and FBB-ADHD scales among school-aged children, *unadjusted* for covariates.

| <b>Eyes Closed</b> |                  | <b>B</b>    | <b>SE B</b> | <b><math>\beta</math></b> | <b><math>R^2</math></b> | <b>F</b>    | <b>t</b>    | <b>p</b>    |
|--------------------|------------------|-------------|-------------|---------------------------|-------------------------|-------------|-------------|-------------|
| Delta              | Frontal          | .005        | .004        | .110                      | .012                    | 1.69        | 1.30        | .195        |
|                    | <b>Central</b>   | <b>.004</b> | <b>.002</b> | <b>.178</b>               | <b>.032</b>             | <b>4.55</b> | <b>2.13</b> | <b>.035</b> |
|                    | <b>Posterior</b> | <b>.005</b> | <b>.002</b> | <b>.184</b>               | <b>.034</b>             | <b>4.87</b> | <b>2.21</b> | <b>.029</b> |
|                    | <b>Overall</b>   | <b>.004</b> | <b>.002</b> | <b>.166</b>               | <b>.028</b>             | <b>3.94</b> | <b>1.98</b> | <b>.049</b> |
| Theta              | Frontal          | .002        | .001        | .175                      | .031                    | 4.40        | 2.10        | .038        |
|                    | Central          | .001        | .001        | .111                      | .012                    | 1.73        | 1.31        | .191        |
|                    | <b>Posterior</b> | <b>.002</b> | <b>.001</b> | <b>.192</b>               | <b>.037</b>             | <b>5.32</b> | <b>2.31</b> | <b>.023</b> |
|                    | <b>Overall</b>   | <b>.002</b> | <b>.001</b> | <b>.181</b>               | <b>.033</b>             | <b>4.71</b> | <b>2.17</b> | <b>.032</b> |
| Alpha              | Frontal          | .002        | .001        | .223                      | .050                    | 7.25        | 2.69        | .009        |
|                    | <b>Central</b>   | <b>.001</b> | <b>.001</b> | <b>.172</b>               | <b>.030</b>             | <b>4.25</b> | <b>2.06</b> | <b>.041</b> |
|                    | Posterior        | .002        | .001        | .118                      | .014                    | 1.97        | 1.40        | .163        |
|                    | <b>Overall</b>   | <b>.002</b> | <b>.001</b> | <b>.178</b>               | <b>.032</b>             | <b>4.53</b> | <b>2.13</b> | <b>.035</b> |
| Beta               | Frontal          | .001        | .000        | .027                      | .001                    | .101        | .317        | .751        |
|                    | Central          | .001        | .000        | -.006                     | .000                    | .005        | -.072       | .942        |
|                    | Posterior        | .001        | .000        | .077                      | .006                    | .821        | .906        | .366        |
|                    | <b>Overall</b>   | <b>.001</b> | <b>.000</b> | <b>.039</b>               | <b>.002</b>             | <b>.211</b> | <b>.460</b> | <b>.647</b> |

| <b>Eyes Open</b> |                  | <b>B</b>    | <b>SE B</b> | <b><math>\beta</math></b> | <b><math>R^2</math></b> | <b>F</b>    | <b>t</b>     | <b>p</b>    |
|------------------|------------------|-------------|-------------|---------------------------|-------------------------|-------------|--------------|-------------|
| Delta            | Frontal          | -.001       | .003        | -.015                     | .000                    | 0.03        | -0.18        | .856        |
|                  | Central          | .002        | .001        | .143                      | .020                    | 2.88        | 1.70         | .092        |
|                  | Posterior        | .003        | .002        | .142                      | .020                    | 2.82        | 1.69         | .094        |
|                  | <b>Overall</b>   | <b>.002</b> | <b>.002</b> | <b>.073</b>               | <b>.005</b>             | <b>0.73</b> | <b>0.85</b>  | <b>.394</b> |
| Theta            | <b>Frontal</b>   | <b>.001</b> | <b>.001</b> | <b>.177</b>               | <b>.031</b>             | <b>4.48</b> | <b>2.12</b>  | <b>.036</b> |
|                  | <b>Central</b>   | <b>.002</b> | <b>.001</b> | <b>.215</b>               | <b>.046</b>             | <b>6.70</b> | <b>2.59</b>  | <b>.011</b> |
|                  | <b>Posterior</b> | <b>.002</b> | <b>.001</b> | <b>.213</b>               | <b>.045</b>             | <b>6.57</b> | <b>2.56</b>  | <b>.011</b> |
|                  | <b>Overall</b>   | <b>.001</b> | <b>.001</b> | <b>.220</b>               | <b>.048</b>             | <b>7.00</b> | <b>2.65</b>  | <b>.009</b> |
| Alpha            | Frontal          | .001        | .000        | .153                      | .023                    | 3.03        | 1.82         | .071        |
|                  | <b>Central</b>   | <b>.001</b> | <b>.000</b> | <b>.197</b>               | <b>.039</b>             | <b>5.57</b> | <b>2.36</b>  | <b>.020</b> |
|                  | Posterior        | .001        | .001        | .102                      | .010                    | 1.45        | 1.20         | .231        |
|                  | <b>Overall</b>   | <b>.001</b> | <b>.000</b> | <b>.152</b>               | <b>.023</b>             | <b>3.25</b> | <b>1.80</b>  | <b>.074</b> |
| Beta             | Frontal          | .001        | .000        | -.054                     | .003                    | 0.40        | -0.63        | .529        |
|                  | Central          | .001        | .000        | .025                      | .001                    | 0.09        | 0.30         | .766        |
|                  | Posterior        | .001        | .000        | .059                      | .004                    | 0.49        | 0.70         | .485        |
|                  | <b>Overall</b>   | <b>.001</b> | <b>.000</b> | <b>-.008</b>              | <b>.000</b>             | <b>0.01</b> | <b>-0.10</b> | <b>.922</b> |

| <b>FBB-ADHD</b>      |  | <b>B</b>    | <b>SE B</b> | <b><math>\beta</math></b> | <b><math>R^2</math></b> | <b>F</b>    | <b>t</b>    | <b>p</b>    |
|----------------------|--|-------------|-------------|---------------------------|-------------------------|-------------|-------------|-------------|
| <b>Hyperactivity</b> |  | <b>1.26</b> | <b>.472</b> | <b>.219</b>               | <b>.048</b>             | <b>7.06</b> | <b>2.66</b> | <b>.009</b> |
| Attention deficit    |  | .131        | .338        | .033                      | .001                    | .150        | .387        | .699        |
| Impulsivity          |  | .016        | .463        | .003                      | .000                    | .001        | .034        | .973        |
| Total                |  | .387        | .349        | .093                      | .009                    | 1.23        | 1.11        | .269        |

**Table S3:** Association of prenatal tobacco smoking of any severity with FBB-ADHD scales among school-aged children, *adjusted* for covariates.

| <b>FBB-ADHD</b>   | <b>B</b> | <b>Lower<br/>CI</b> | <b>Upper<br/>CI</b> | <b>R<sup>2</sup>(adjusted)</b> | <b>p</b> | <b>SE</b> | <b>R<sup>2</sup>(%)</b> |
|-------------------|----------|---------------------|---------------------|--------------------------------|----------|-----------|-------------------------|
| Hyperactivity     | -.003    | -.007               | .001                | .059                           | .476     | .004      | .600                    |
| Attention deficit | .002     | -.001               | .004                | -.024                          | .599     | .003      | .940                    |
| Impulsivity       | -.024    | -.027               | -.020               | -.024                          | .896     | .004      | .960                    |
| Total             | .000     | -.004               | .003                | -.045                          | .876     | .003      | .950                    |

**Table S4:** Significant associations between covariates included in GAMMs and outcomes.

|                                                | Brain<br>activity | Impulsivity | Inattention | Hyperactivity | ADHD-FBB<br>(Total) |
|------------------------------------------------|-------------------|-------------|-------------|---------------|---------------------|
| <i>Higher scores = Greater problems</i>        |                   |             |             |               |                     |
| <b>Maternal measures</b>                       |                   |             |             |               |                     |
| ↑ Age at birth                                 | +                 |             |             | +             | +                   |
| ↑ Gestational age (week of pregnancy at birth) | +/-               |             |             |               |                     |
| Psychopathology                                | +                 |             |             |               |                     |
| Smoking before pregnancy                       | -                 |             |             |               |                     |
| Alcohol consumption during pregnancy           | -                 | +           |             |               | +                   |

Note. "+" = positive association, "-" = negative association, "+/-" = both positive and negative associations were observed. If there is no + or -, no significant association was observed in the GAMMs.

**Table S5:** Mediation Analyses\* – FBB-ADHD: Hyperactivity in eyes closed resting state condition

|       |           | Smoking -> Brain activity |             | Brain activity-> Hyperactivity |          | Smoking-> Hyperactivity<br>(direct effect) |          | Smoking-> Hyperactivity<br>(indirect effect) |          | Total effect       |          |
|-------|-----------|---------------------------|-------------|--------------------------------|----------|--------------------------------------------|----------|----------------------------------------------|----------|--------------------|----------|
|       |           | <i>B</i> (95% CI)         | <i>p</i>    | <i>B</i> (95% CI)              | <i>p</i> | <i>B</i> (95% CI)                          | <i>p</i> | <i>B</i> (95% CI)                            | <i>p</i> | <i>B</i> (95% CI)  | <i>p</i> |
| Delta | Frontal   | .006 (-.001;.013)         | .092        | -.012 (-.049;.026)             | .545     | .000 (-.001;.001)                          | .965     | .000 (-.001;.000)                            | .789     | -.000 (-.001;.001) | .955     |
|       | Central   | <b>.004 (.000;.008)</b>   | <b>.037</b> | .032 (-.034;.098)              | .344     | -.000 (-.002;.001)                         | .799     | .000 (-.000;.001)                            | .664     | -.000 (-.001;.001) | .955     |
|       | Posterior | .004 (-.001;.008)         | .085        | .028 (-.034;.090)              | .373     | -.000 (-.002;.001)                         | .834     | .000 (-.000;.001)                            | .608     | -.000 (-.001;.001) | .955     |
|       | Overall   | <b>.005 (.000;.009)</b>   | <b>.041</b> | .006 (-.053;.064)              | .846     | -.000 (-.001;.001)                         | .923     | .000 (-.000;.001)                            | .852     | -.000 (-.001;.001) | .955     |
| Theta | Frontal   | <b>.003 (.001;.005)</b>   | <b>.009</b> | .010 (-.099;.120)              | .852     | -.000 (-.001;.001)                         | .915     | .000 (-.000;.001)                            | .900     | -.000 (-.001;.001) | .955     |
|       | Central   | .001 (-.001;.003)         | .175        | .017 (-.120;.154)              | .802     | -.000 (-.001;.001)                         | .928     | .000 (-.000;.000)                            | .860     | -.000 (-.001;.001) | .955     |
|       | Posterior | .002 (-.000;.004)         | .056        | .032 (-.083;.146)              | .586     | -.000 (-.001;.001)                         | .873     | .000 (-.000;.001)                            | .724     | -.000 (-.001;.001) | .955     |
|       | Overall   | <b>.002 (.000;.004)</b>   | <b>.028</b> | .023 (-.103;.149)              | .719     | -.000 (.000;.004)                          | .892     | .000 (-.000;.001)                            | .804     | -.000 (-.001;.001) | .955     |
| Alpha | Frontal   | <b>.002 (.001;.004)</b>   | <b>.004</b> | .023 (-.148;.194)              | .788     | .000 (-.002;.001)                          | .892     | .000 (-.000;.001)                            | .848     | -.000 (-.001;.001) | .955     |
|       | Central   | .001 (-.000;.002)         | .106        | .088 (-.108;.284)              | .375     | -.000 (-.002;.001)                         | .842     | .000 (-.000;.001)                            | .596     | -.000 (-.001;.001) | .955     |
|       | Posterior | .000 (-.003;.003)         | .845        | .051 (-.043;.145)              | .288     | -.000 (-.001;.001)                         | .939     | .000 (-.000;.000)                            | .952     | -.000 (-.001;.001) | .955     |
|       | Overall   | .001 (-.001;.003)         | .171        | .069 (-.083;.220)              | .371     | -.000 (-.001;.001)                         | .859     | .000 (-.000;.000)                            | .572     | -.000 (-.001;.001) | .955     |
| Beta  | Frontal   | .000 (-.000;.000)         | .372        | -.221 (-1.391;.950)            | .709     | -.000 (-.001;.001)                         | .981     | .000 (-.000;.000)                            | .672     | -.000 (-.001;.001) | .955     |
|       | Central   | .000 (-.000;.000)         | .999        | .198 (-1.673;2.069)            | .834     | -.000 (-.001;.001)                         | .955     | .000 (-.000;.000)                            | .892     | -.000 (-.001;.001) | .955     |
|       | Posterior | .000 (-.000;.000)         | .388        | .412 (-1.399;2.222)            | .653     | -.000 (-.001;.001)                         | .925     | .000 (-.000;.000)                            | .816     | -.000 (-.001;.001) | .955     |
|       | Overall   | .000 (-.000;.000)         | .512        | -.111 (-1.796;1.574)           | .896     | -.000 (-.001;.001)                         | .962     | .000 (-.000;.000)                            | .936     | -.000 (-.001;.001) | .955     |

*Note:* \*adjusted for following covariates: child's sex, child's age, maternal age at giving birth; maternal psychopathology; maternal smoking before pregnancy; maternal alcohol drinking, week of pregnancy at birth.

**Table S6:** Mediation Analyses\* – FBB-ADHD: Hyperactivity in eyes open resting state condition

|       |           | Smoking -> Brain activity |             | Brain activity-> Hyperactivity |          | Smoking-> Hyperactivity<br>(direct effect) |          | Smoking-> Hyperactivity<br>(indirect effect) |          | Total effect       |          |
|-------|-----------|---------------------------|-------------|--------------------------------|----------|--------------------------------------------|----------|----------------------------------------------|----------|--------------------|----------|
|       |           | <i>B</i> (95% CI)         | <i>p</i>    | <i>B</i> (95% CI)              | <i>p</i> | <i>B</i> (95% CI)                          | <i>p</i> | <i>B</i> (95% CI)                            | <i>p</i> | <i>B</i> (95% CI)  | <i>p</i> |
| Delta | Frontal   | .000 (-.006;.006)         | .989        | .021 (-.026;.068)              | .382     | -.000 (-.001;.001)                         | .954     | .000 (-.001;.000)                            | .976     | -.000 (-.001;.001) | .955     |
|       | Central   | .003 (-.000;.006)         | .084        | .045 (-.042;.133)              | .306     | -.000 (-.002;.001)                         | .816     | .000 (-.000;.001)                            | .644     | -.000 (-.001;.001) | .955     |
|       | Posterior | .002 (-.002;.006)         | .235        | .042 (-.026;.109)              | .223     | -.000 (-.002;.001)                         | .842     | .000 (-.000;.001)                            | .796     | -.000 (-.001;.001) | .955     |
|       | Overall   | .002 (-.002;.005)         | .371        | .048 (-.028;.123)              | .213     | -.000 (-.001;.001)                         | .868     | .000 (-.000;.001)                            | .864     | -.000 (-.001;.001) | .955     |
| Theta | Frontal   | <b>.002 (.000;.003)</b>   | <b>.011</b> | .040 (-.156;.236)              | .689     | -.000 (-.002;.001)                         | .874     | .000 (-.000;.001)                            | .832     | -.000 (-.001;.001) | .955     |
|       | Central   | <b>.002 (.001;.003)</b>   | <b>.004</b> | .020 (-.182;.223)              | .842     | -.000 (-.002;.001)                         | .908     | .000 (-.000;.001)                            | .856     | -.000 (-.001;.001) | .955     |
|       | Posterior | <b>.002 (.000;.003)</b>   | <b>.016</b> | .052 (-.149;.252)              | .610     | -.000 (-.002;.001)                         | .857     | .000 (-.000;.001)                            | .736     | -.000 (-.001;.001) | .955     |
|       | Overall   | <b>.002 (.001;.003)</b>   | <b>.005</b> | .046 (-.172;.264)              | .677     | -.000 (-.002;.001)                         | .860     | .000 (-.000;.001)                            | .816     | -.000 (-.001;.001) | .955     |
| Alpha | Frontal   | .000 (-.000;.001)         | .255        | .161 (-.246;.568)              | .435     | -.000 (-.001;.001)                         | .885     | .000 (-.000;.001)                            | .780     | -.000 (-.001;.001) | .955     |
|       | Central   | .001 (-.000;.001)         | .221        | .212 (-.111;.535)              | .196     | -.000 (-.002;.001)                         | .831     | .000 (-.000;.001)                            | .560     | -.000 (-.001;.001) | .955     |
|       | Posterior | -.000 (-.002;.001)        | .493        | .135 (-.065;.335)              | .183     | .000 (-.001;.001)                          | .973     | -.000 (-.002;.001)                           | .792     | -.000 (-.001;.001) | .955     |
|       | Overall   | .000 (-.001;.001)         | .801        | .205 (-.104;.514)              | .191     | -.000 (-.001;.001)                         | .929     | .000 (-.000;.000)                            | .852     | -.000 (-.001;.001) | .955     |
| Beta  | Frontal   | -.000 (-.000;.000)        | .629        | -.624 (-1.617;.370)            | .501     | -.000 (-.001;.001)                         | .908     | .000 (-.000;.000)                            | .716     | -.000 (-.001;.001) | .955     |
|       | Central   | -.000 (-.000;.000)        | .720        | -.863 (-2.438;.712)            | .280     | -.000 (-.001;.001)                         | .986     | -.000 (-.000;.000)                           | .568     | -.000 (-.001;.001) | .955     |
|       | Posterior | .000 (-.000;.000)         | .610        | -.012 (-2.198;1.959)           | .909     | -.000 (-.001;.001)                         | .960     | -.000 (-.000;.000)                           | .960     | -.000 (-.001;.001) | .955     |
|       | Overall   | -.000 (-.000;.000)        | .965        | -.924 (-2.530;.646)            | .965     | -.000 (-.001;.001)                         | .959     | -.000 (-.000;.000)                           | .824     | -.000 (-.001;.001) | .955     |

*Note:* \*adjusted for following covariates: child's sex, child's age, maternal age at giving birth; maternal psychopathology; maternal smoking before pregnancy; maternal alcohol drinking, week of pregnancy at birth.

**Table S7:** Mediation Analyses\* – FBB-ADHD: Inattention in eyes closed resting state condition

|       |           | Smoking -> Brain activity |             | Brain activity-> Inattention |          | Smoking-> Inattention<br>(direct effect) |          | Smoking-> Inattention<br>(indirect effect) |          | Total effect      |          |
|-------|-----------|---------------------------|-------------|------------------------------|----------|------------------------------------------|----------|--------------------------------------------|----------|-------------------|----------|
|       |           | <i>B</i> (95% CI)         | <i>p</i>    | <i>B</i> (95% CI)            | <i>p</i> | <i>B</i> (95% CI)                        | <i>p</i> | <i>B</i> (95% CI)                          | <i>p</i> | <i>B</i> (95% CI) | <i>p</i> |
| Delta | Frontal   | .006 (-.001;.013)         | .092        | -.024 (-.080;.033)           | .405     | .001 (-.001;.003)                        | .170     | .000 (-.000;.001)                          | .568     | .001 (-.001;.003) | .224     |
|       | Central   | <b>.004 (.000;.008)</b>   | <b>.037</b> | -.024 (-.080;.033)           | .522     | .001 (-.001;.003)                        | .269     | .000 (-.000;.001)                          | .864     | .001 (-.001;.003) | .224     |
|       | Posterior | .004 (-.001;.008)         | .085        | -.004 (-.053;.133)           | .394     | .001 (-.001;.003)                        | .278     | .000 (-.000;.001)                          | .684     | .001 (-.001;.003) | .224     |
|       | Overall   | <b>.005 (.000;.009)</b>   | <b>.041</b> | -.001 (-.089;.087)           | .985     | .001 (-.001;.003)                        | .215     | .000 (-.000;.001)                          | .916     | .001 (-.001;.003) | .224     |
| Theta | Frontal   | <b>.003 (.001;.005)</b>   | <b>.009</b> | -.014 (-.178;.150)           | .869     | .001 (-.001;.003)                        | .196     | .000 (-.000;.001)                          | .672     | .001 (-.001;.003) | .224     |
|       | Central   | .001 (-.001;.003)         | .175        | -.008 (-.213;.197)           | .103     | .001 (-.001;.003)                        | .218     | .000 (-.000;.001)                          | .868     | .001 (-.001;.003) | .224     |
|       | Posterior | .002 (-.000;.004)         | .056        | -.004 (-.053;.133)           | .384     | .001 (-.001;.003)                        | .285     | .000 (-.000;.001)                          | .684     | .001 (-.001;.003) | .224     |
|       | Overall   | <b>.002 (.000;.004)</b>   | <b>.028</b> | .025 (-.164;.214)            | .795     | .001 (-.001;.003)                        | .237     | .000 (-.000;.001)                          | .980     | .001 (-.001;.003) | .224     |
| Alpha | Frontal   | <b>.002 (.001;.004)</b>   | <b>.004</b> | .049 (-.207;.306)            | .703     | .001 (-.001;.003)                        | .250     | .000 (-.001;.001)                          | .960     | .001 (-.001;.003) | .224     |
|       | Central   | .001 (-.000;.002)         | .106        | .063 (-.231;.357)            | .672     | .001 (-.001;.003)                        | .247     | .000 (-.000;.001)                          | .932     | .001 (-.001;.003) | .224     |
|       | Posterior | .000 (-.003;.003)         | .845        | .072 (-.069;.213)            | .313     | .001 (-.001;.003)                        | .231     | .000 (-.000;.001)                          | .980     | .001 (-.001;.003) | .224     |
|       | Overall   | .001 (-.001;.003)         | .171        | .092 (-.135;.319)            | .424     | .001 (-.001;.003)                        | .264     | .000 (-.000;.001)                          | .756     | .001 (-.001;.003) | .224     |
| Beta  | Frontal   | .000 (-.000;.000 )        | .372        | 1.170 (-.568;2.909)          | .185     | .001 (-.001;.003)                        | .268     | .000 (-.000;.001)                          | .652     | .001 (-.001;.003) | .224     |
|       | Central   | .000 (-.000;.000 )        | .999        | 1.530 (-1.256;4.315)         | .279     | .001 (-.001;.003)                        | .224     | .000 (-.000;.000)                          | .948     | .001 (-.001;.003) | .224     |
|       | Posterior | .000 (-.000;.000 )        | .388        | 2.445 (-.214;5.127)          | .071     | .001 (-.001;.003)                        | .281     | .000 (-.000;.001)                          | .596     | .001 (-.001;.003) | .224     |
|       | Overall   | .000 (-.000;.000 )        | .512        | 2.445 (-.214;5.127)          | .129     | .001 (-.001;.003)                        | .260     | .000 (-.000;.001)                          | .516     | .001 (-.001;.003) | .224     |

*Note:* \*adjusted for following covariates: child's sex, child's age, maternal age at giving birth; maternal psychopathology; maternal smoking before pregnancy; maternal alcohol drinking, week of pregnancy at birth.

**Table S8:** Mediation Analyses\* – FBB-ADHD: Inattention in eyes open resting state condition

|       |           | Smoking -> Brain activity |             | Brain activity-> Inattention |          | Smoking-> Inattention<br>(direct effect) |          | Smoking-> Inattention<br>(indirect effect) |          | Total effect      |          |
|-------|-----------|---------------------------|-------------|------------------------------|----------|------------------------------------------|----------|--------------------------------------------|----------|-------------------|----------|
|       |           | <i>B</i> (95% CI)         | <i>p</i>    | <i>B</i> (95% CI)            | <i>p</i> | <i>B</i> (95% CI)                        | <i>p</i> | <i>B</i> (95% CI)                          | <i>p</i> | <i>B</i> (95% CI) | <i>p</i> |
| Delta | Frontal   | .000 (-.006;.006)         | .989        | .009 (-.062;.080)            | .799     | .001 (-.001;.003)                        | .226     | .000 (-.001;.000)                          | .984     | .001 (-.001;.003) | .224     |
|       | Central   | .003 (-.000;.006)         | .084        | -.023 (-.155;.109)           | .728     | .001 (-.001;.003)                        | .197     | -.000 (-.001;.000)                         | .856     | .001 (-.001;.003) | .224     |
|       | Posterior | .002 (-.002;.006)         | .235        | .018 (-.084;.120)            | .726     | .001 (-.001;.003)                        | .239     | .000 (-.000;.000)                          | .808     | .001 (-.001;.003) | .224     |
|       | Overall   | .002 (-.002;.005)         | .371        | .012 (-.102;.126)            | .834     | .001 (-.001;.003)                        | .231     | .000 (-.001;.000)                          | .908     | .001 (-.001;.003) | .224     |
| Theta | Frontal   | <b>.002 (.000;.003)</b>   | <b>.011</b> | .166 (-.126;.458)            | .261     | .001 (-.001;.003)                        | .332     | -.000 (-.000;.000)                         | .668     | .001 (-.001;.003) | .224     |
|       | Central   | <b>.002 (.001;.003)</b>   | <b>.004</b> | .062 (-.241;.365)            | .686     | .001 (-.001;.003)                        | .253     | -.000 (-.000;.000)                         | .880     | .001 (-.001;.003) | .224     |
|       | Posterior | <b>.002 (.000;.003)</b>   | <b>.016</b> | .101 (-.199;.400)            | .507     | .001 (-.001;.003)                        | .277     | -.000 (-.000;.000)                         | .724     | .001 (-.001;.003) | .224     |
|       | Overall   | <b>.002 (.001;.003)</b>   | <b>.005</b> | .137 (-.190;.463)            | .408     | .001 (-.001;.003)                        | .305     | -.000 (-.000;.000)                         | .664     | .001 (-.001;.003) | .224     |
| Alpha | Frontal   | .000 (-.000;.001)         | .255        | .170 (-.440;.781)            | .582     | .001 (-.001;.003)                        | .247     | .000 (-.000;.001)                          | .996     | .001 (-.001;.003) | .224     |
|       | Central   | .001 (-.000;.001)         | .221        | .213 (-.272;.699)            | .386     | .001 (-.001;.003)                        | .264     | .000 (-.000;.001)                          | .744     | .001 (-.001;.003) | .224     |
|       | Posterior | -.000 (-.002;.001)        | .493        | .055 (-.246;.357)            | .716     | .001 (-.001;.003)                        | .215     | .000 (-.001;.001)                          | .920     | .001 (-.001;.003) | .224     |
|       | Overall   | .000 (-.001;.001)         | .801        | .138 (-.328;.604)            | .558     | .001 (-.001;.003)                        | .231     | .000 (-.000;.001)                          | .992     | .001 (-.001;.003) | .224     |
| Beta  | Frontal   | -.000 (-.000;.000)        | .629        | -.588 (-2.082;.905)          | .436     | .001 (-.001;.003)                        | .239     | .000 (-.000;.001)                          | .900     | .001 (-.001;.003) | .224     |
|       | Central   | .000 (-.000;.000)         | .720        | -.253 (-2.624;2.118)         | .833     | .001 (-.001;.003)                        | .223     | .000 (-.000;.001)                          | .848     | .001 (-.001;.003) | .224     |
|       | Posterior | .000 (-.000;.000)         | .610        | .977 (-2.129;4.083)          | .534     | .001 (-.001;.003)                        | .237     | .000 (-.000;.001)                          | .692     | .001 (-.001;.003) | .224     |
|       | Overall   | .000 (-.000;.000)         | .965        | -.425 (-2.817;1.967)         | .726     | .001 (-.001;.003)                        | .225     | .000 (-.000;.001)                          | .952     | .001 (-.001;.003) | .224     |

*Note:* \*adjusted for following covariates: child's sex, child's age, maternal age at giving birth; maternal psychopathology; maternal smoking before pregnancy; maternal alcohol drinking, week of pregnancy at birth.

**Table S9:** Mediation Analyses\* – FBB-ADHD: Impulsivity in eyes closed resting state condition

|       |           | Smoking -> Brain activity |             | Brain activity-> Impulsivity |             | Smoking-> Impulsivity<br>(direct effect) |          | Smoking-> Impulsivity<br>(indirect effect) |          | Total effect      |          |
|-------|-----------|---------------------------|-------------|------------------------------|-------------|------------------------------------------|----------|--------------------------------------------|----------|-------------------|----------|
|       |           | <i>B</i> (95% CI)         | <i>p</i>    | <i>B</i> (95% CI)            | <i>p</i>    | <i>B</i> (95% CI)                        | <i>p</i> | <i>B</i> (95% CI)                          | <i>p</i> | <i>B</i> (95% CI) | <i>p</i> |
| Delta | Frontal   | .006 (-.001;.013)         | .092        | .021 (-.034;.077)            | .446        | .001 (-.001;.003)                        | .541     | .000 (-.000;.001)                          | .604     | .001 (-.001;.003) | .465     |
|       | Central   | <b>.004 (.000;.008)</b>   | <b>.037</b> | <b>.107 (.012;.202)</b>      | <b>.028</b> | .001 (-.001;.003)                        | .766     | .000 (-.000;.001)                          | .432     | .001 (-.001;.003) | .465     |
|       | Posterior | .004 (-.001;.008)         | .085        | <b>.103 (.014;.192)</b>      | <b>.024</b> | .001 (-.001;.003)                        | .715     | .000 (-.000;.001)                          | .468     | .001 (-.001;.003) | .465     |
|       | Overall   | <b>.005 (.000;.009)</b>   | <b>.041</b> | .075 (-.010;.160)            | .083        | .001 (-.001;.003)                        | .691     | .000 (-.000;.001)                          | .404     | .001 (-.001;.003) | .465     |
| Theta | Frontal   | <b>.003 (.001;.005)</b>   | <b>.009</b> | .053 (-.107;.213)            | .515        | .001 (-.001;.003)                        | .535     | .000 (-.000;.001)                          | .596     | .001 (-.001;.003) | .465     |
|       | Central   | .001 (-.001;.003)         | .175        | .087 (-.113;.287)            | .390        | .001 (-.001;.003)                        | .535     | .000 (-.000;.001)                          | .596     | .001 (-.001;.003) | .465     |
|       | Posterior | .002 (-.000;.004)         | .056        | .084 (-.092;.244)            | .370        | .001 (-.001;.003)                        | .567     | .000 (-.000;.001)                          | .596     | .001 (-.001;.003) | .465     |
|       | Overall   | <b>.002 (.000;.004)</b>   | <b>.028</b> | .080 (-.105;.264)            | .394        | .001 (-.001;.003)                        | .576     | .000 (-.000;.001)                          | .608     | .001 (-.001;.003) | .465     |
| Alpha | Frontal   | <b>.002 (.001;.004)</b>   | <b>.004</b> | .200 (-.047;.448)            | .125        | .001 (-.001;.003)                        | .760     | .000 (-.000;.001)                          | .952     | .001 (-.001;.003) | .465     |
|       | Central   | .001 (-.000;.002)         | .106        | <b>.301 (.019;.583)</b>      | <b>.037</b> | .001 (-.001;.003)                        | .679     | .000 (-.000;.001)                          | .448     | .001 (-.001;.003) | .465     |
|       | Posterior | .000 (-.003;.003)         | .845        | .080 (-.058;.217)            | .225        | .001 (-.001;.003)                        | .478     | .000 (-.000;.001)                          | .960     | .001 (-.001;.003) | .465     |
|       | Overall   | .001 (-.001;.003)         | .171        | .182 (-.038;.402)            | .104        | .001 (-.001;.003)                        | .602     | .000 (-.000;.001)                          | .412     | .001 (-.001;.003) | .465     |
| Beta  | Frontal   | .000 (-.000;.000)         | .372        | .641 (-1.071;2.352)          | .459        | .001 (-.001;.003)                        | .505     | .000 (-.000;.001)                          | .540     | .001 (-.001;.003) | .465     |
|       | Central   | .000 (-.000;.000)         | .845        | .080 (-.058;.217)            | .225        | .001 (-.001;.003)                        | .478     | .000 (-.000;.001)                          | .960     | .001 (-.001;.003) | .465     |
|       | Posterior | .000 (-.000;.000)         | .999        | 2.474 (-.225;5.173)          | .072        | .001 (-.001;.003)                        | .460     | .000 (-.000;.001)                          | .904     | .001 (-.001;.003) | .465     |
|       | Overall   | .000 (-.000;.000)         | .512        | 1.953 (-.487;4.392)          | .116        | .001 (-.001;.003)                        | .526     | .000 (-.000;.001)                          | .404     | .001 (-.001;.003) | .465     |

*Note:* \*adjusted for following covariates: child's sex, child's age, maternal age at giving birth; maternal psychopathology; maternal smoking before pregnancy; maternal alcohol drinking, week of pregnancy at birth.



**Table S10:** Mediation Analyses\* – FBB-ADHD: Impulsivity in eyes open resting state condition

|       |           | Smoking -> Brain activity |             | Brain activity-> Impulsivity |             | Smoking-> Impulsivity<br>(direct effect) |          | Smoking-> Impulsivity<br>(indirect effect) |          | Total effect      |          |
|-------|-----------|---------------------------|-------------|------------------------------|-------------|------------------------------------------|----------|--------------------------------------------|----------|-------------------|----------|
|       |           | <i>B</i> (95% CI)         | <i>p</i>    | <i>B</i> (95% CI)            | <i>p</i>    | <i>B</i> (95% CI)                        | <i>p</i> | <i>B</i> (95% CI)                          | <i>p</i> | <i>B</i> (95% CI) | <i>p</i> |
| Delta | Frontal   | .000 (-.006;.006)         | .989        | .035 (-.034;.105)            | .316        | .001 (-.001;.003)                        | .466     | .000 (-.000;.001)                          | .920     | .001 (-.001;.003) | .465     |
|       | Central   | .003 (-.000;.006)         | .084        | <b>.149 (.023;.275)</b>      | <b>.021</b> | .001 (-.001;.003)                        | .723     | .000 (-.000;.001)                          | .552     | .001 (-.001;.003) | .465     |
|       | Posterior | .002 (-.002;.006)         | .235        | .077 (-.021;.175)            | .124        | .001 (-.001;.003)                        | .576     | .000 (-.001;.002)                          | .816     | .001 (-.001;.003) | .465     |
|       | Overall   | .002 (-.002;.005)         | .371        | .098 (-.012;.208)            | .079        | .001 (-.001;.003)                        | .559     | .000 (-.000;.001)                          | .856     | .001 (-.001;.003) | .465     |
| Theta | Frontal   | <b>.002 (.000;.003)</b>   | <b>.011</b> | .241 (-.043;.524)            | .095        | .001 (-.001;.003)                        | .737     | .000 (-.000;.001)                          | .672     | .001 (-.001;.003) | .465     |
|       | Central   | <b>.002 (.001;.003)</b>   | <b>.004</b> | .187 (-.108;.482)            | .211        | .000 (-.002;.002)                        | .688     | .000 (-.000;.002)                          | .544     | .001 (-.001;.003) | .465     |
|       | Posterior | <b>.002 (.000;.003)</b>   | <b>.016</b> | .163 (-.129;.454)            | .272        | .001 (-.002;.003)                        | .627     | .000 (-.000;.001)                          | .604     | .001 (-.001;.003) | .465     |
|       | Overall   | <b>.002 (.001;.003)</b>   | <b>.005</b> | .238 (-.079;.555)            | .139        | .001 (-.002;.002)                        | .732     | .000 (-.000;.002)                          | .620     | .001 (-.001;.003) | .465     |
| Alpha | Frontal   | .000 (-.000;.001)         | .255        | .522 (-.068;1.112)           | .082        | .001 (-.001;.003)                        | .586     | .000 (-.000;.002)                          | .720     | .001 (-.001;.003) | .465     |
|       | Central   | .001 (-.000;.001)         | .221        | <b>.506 (.040;.973)</b>      | <b>.034</b> | .001 (-.001;.003)                        | .625     | .000 (-.000;.001)                          | .508     | .001 (-.001;.003) | .465     |
|       | Posterior | -.000 (-.002;.001)        | .493        | .170 (-.124;.463)            | .254        | .001 (-.001;.003)                        | .418     | .000 (-.000;.001)                          | .820     | .001 (-.001;.003) | .465     |
|       | Overall   | .000 (-.001;.001)         | .801        | .384 (-.067;.835)            | .094        | .001 (-.001;.003)                        | .487     | .000 (-.000;.001)                          | .852     | .001 (-.001;.003) | .465     |
| Beta  | Frontal   | -.000 (-.000;.000)        | .629        | -.196 (-1.662;1.270)         | .791        | .001 (-.001;.003)                        | .474     | .000 (-.000;.001)                          | .856     | .001 (-.001;.003) | .465     |
|       | Central   | .000 (-.000;.000)         | .720        | -.034 (-2.355;2.287)         | .977        | .001 (-.001;.003)                        | .466     | .000 (-.000;.001)                          | .884     | .001 (-.001;.003) | .465     |
|       | Posterior | .000 (-.000;.000)         | .610        | 1.421 (-1.612;4.454)         | .355        | .001 (-.001;.003)                        | .494     | .000 (-.000;.001)                          | .536     | .001 (-.001;.003) | .465     |
|       | Overall   | .000 (-.000;.000)         | .965        | .169 (-2.173;2.512)          | .886        | .001 (-.001;.003)                        | .468     | .000 (-.000;.001)                          | .804     | .001 (-.001;.003) | .465     |

*Note:* \*adjusted for following covariates: child's sex, child's age, maternal age at giving birth; maternal psychopathology; maternal smoking before pregnancy; maternal alcohol drinking, week of pregnancy at birth.

**Figure S1:** Partial correlation matrix of EEG resting state conditions and FBB-ADHD questionnaire dimensions.

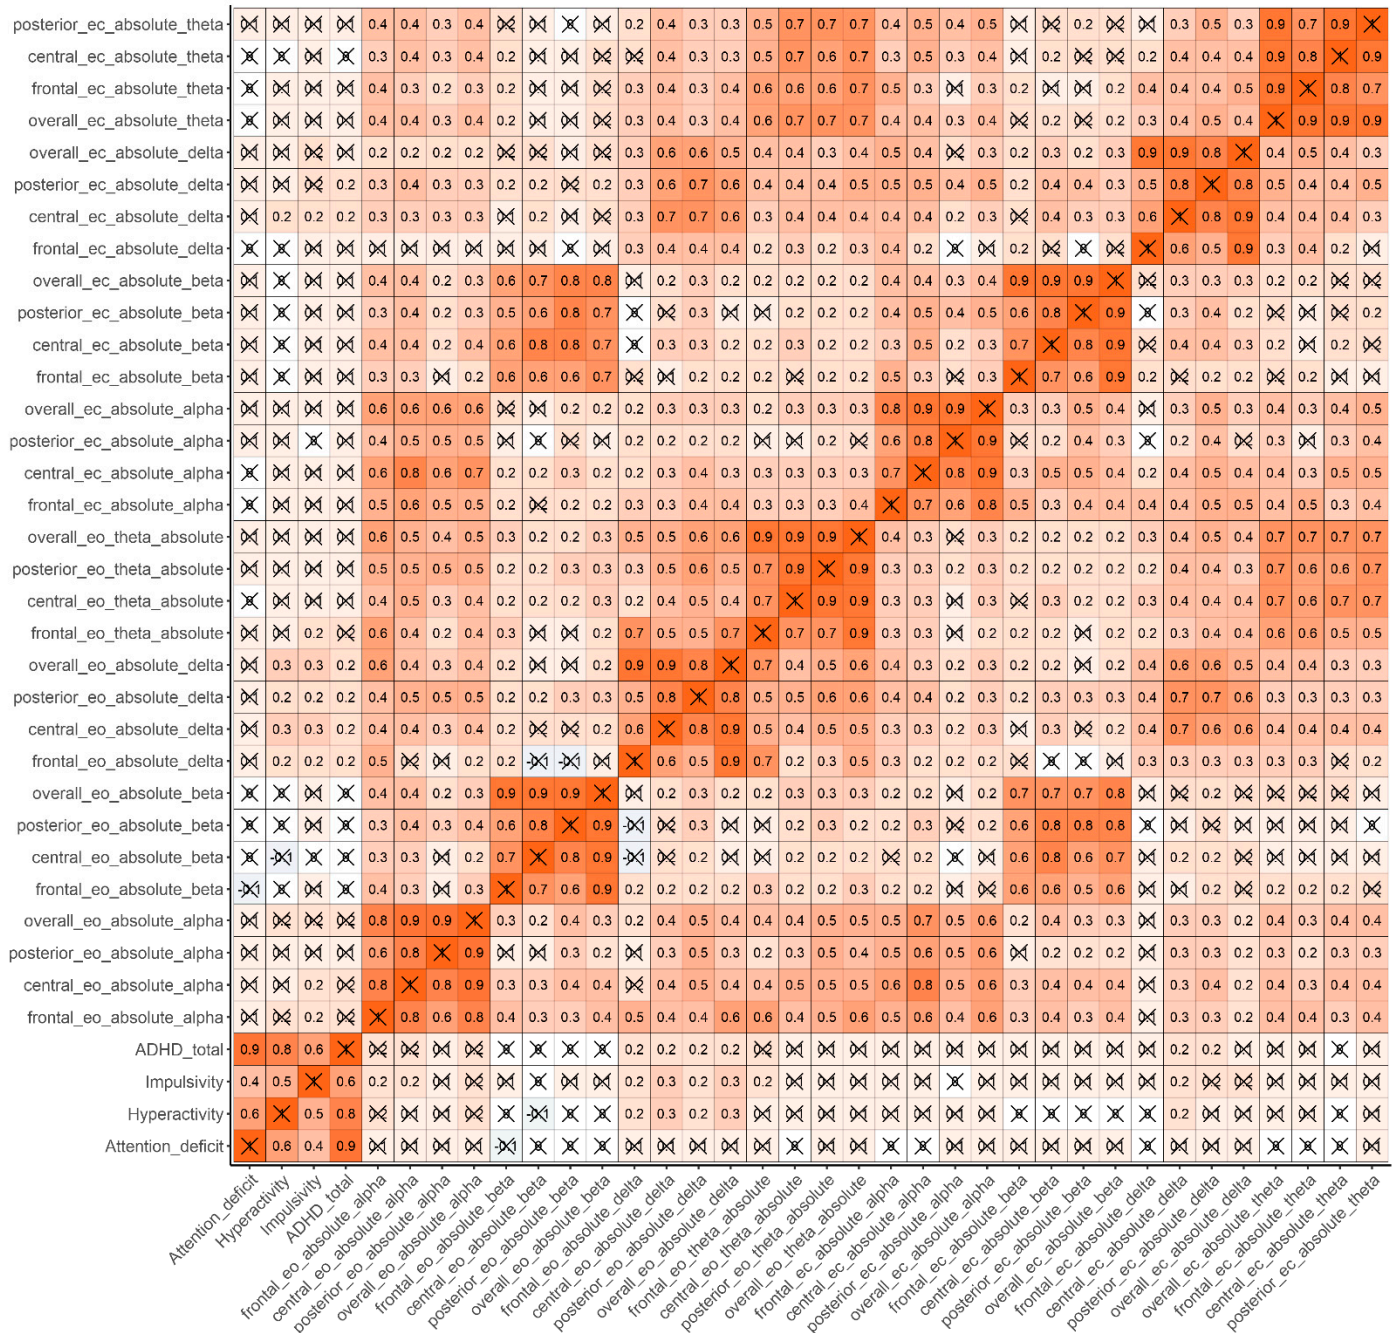

**Note:** X-non significant at  $p < 0.05$ , analysis was performed for absolute power band data (Delta 0.5-3.5 Hz, Theta 3.5-7.5 Hz, Alpha 7.5-12.5 Hz, Beta 12.5-30 Hz), included control variables: child's sex, child's age, maternal age at giving birth, week of pregnancy at birth, maternal psychopathology, maternal smoking during and before pregnancy, maternal alcohol drinking.

**Figure S2:** Pearson correlation matrix of Eyes open resting state condition, maternal smoking and FBB-ADHD questionnaire dimensions.

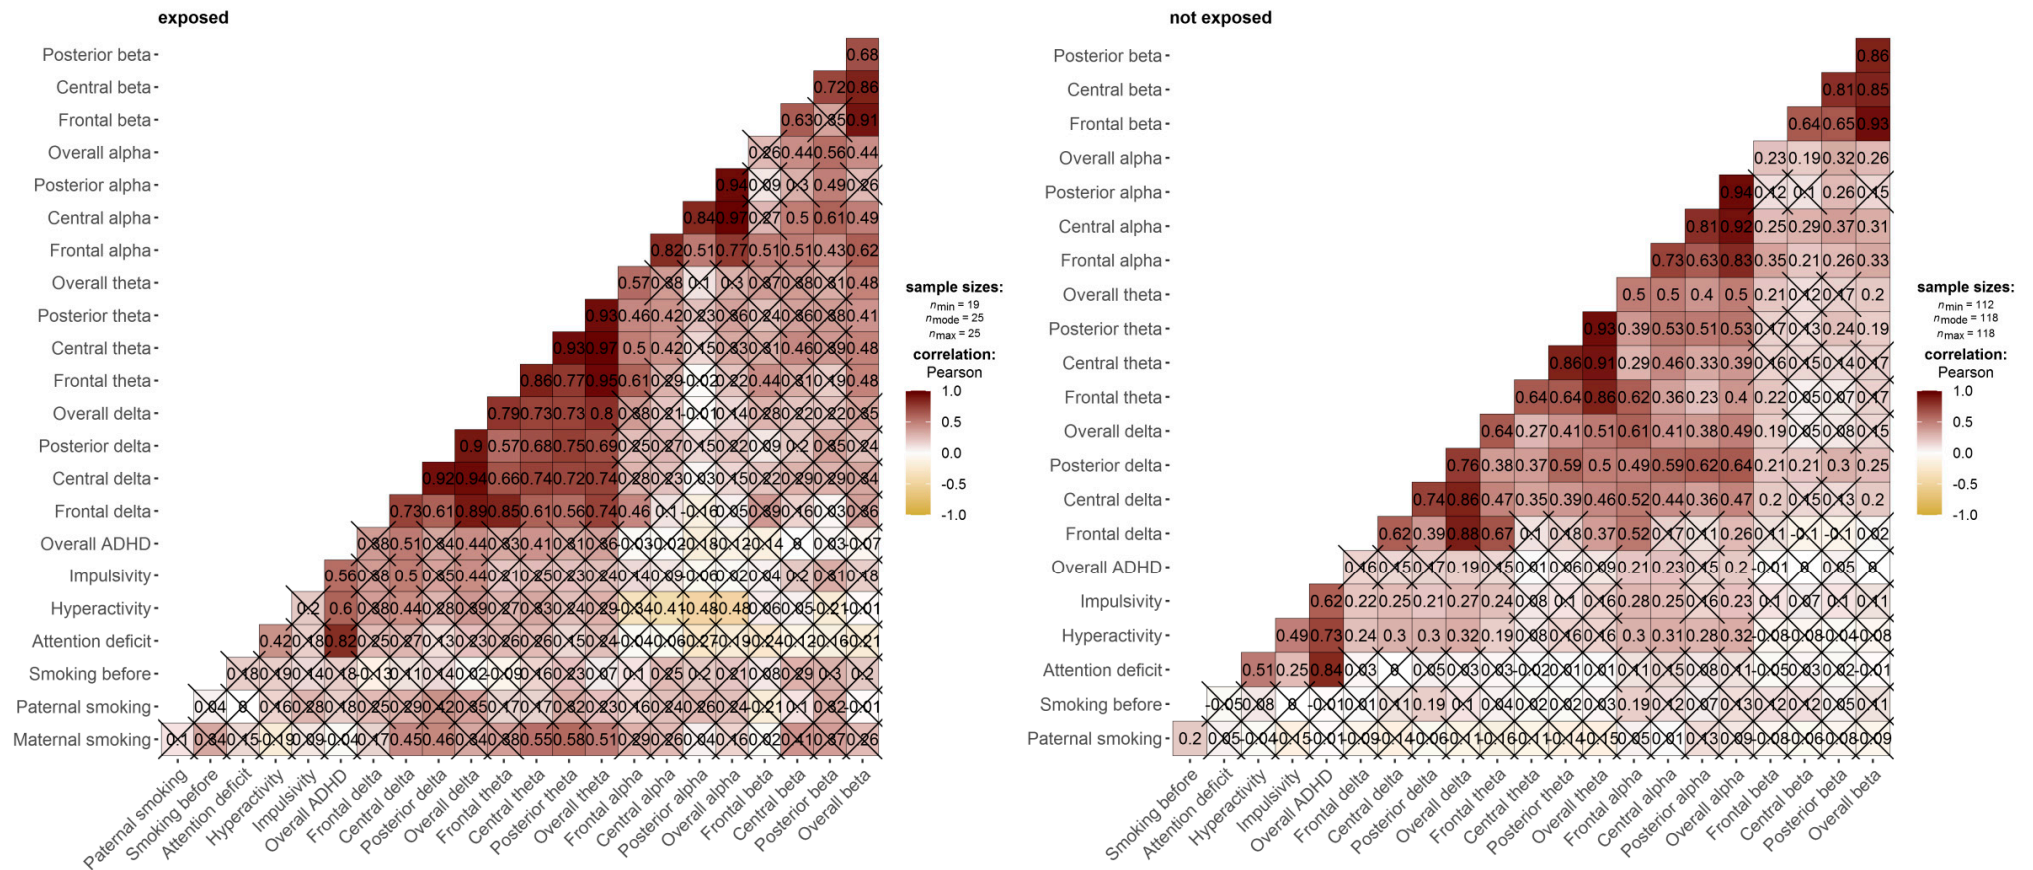

**Note.** X-non significant at  $p < 0.05$ , Parental smoking represents the averaged sum of weekly smoked cigarettes during pregnancy (Trimenon 1-3), analysis was performed for absolute power band data (Delta 0.5-3.5 Hz, Theta 3.5-7.5 Hz, Alpha 7.5-12.5 Hz, Beta 12.5-30 Hz).



**Figure S3:** Pearson correlation matrix of Eyes closed resting state condition, maternal smoking and FBB-ADHD questionnaire dimensions

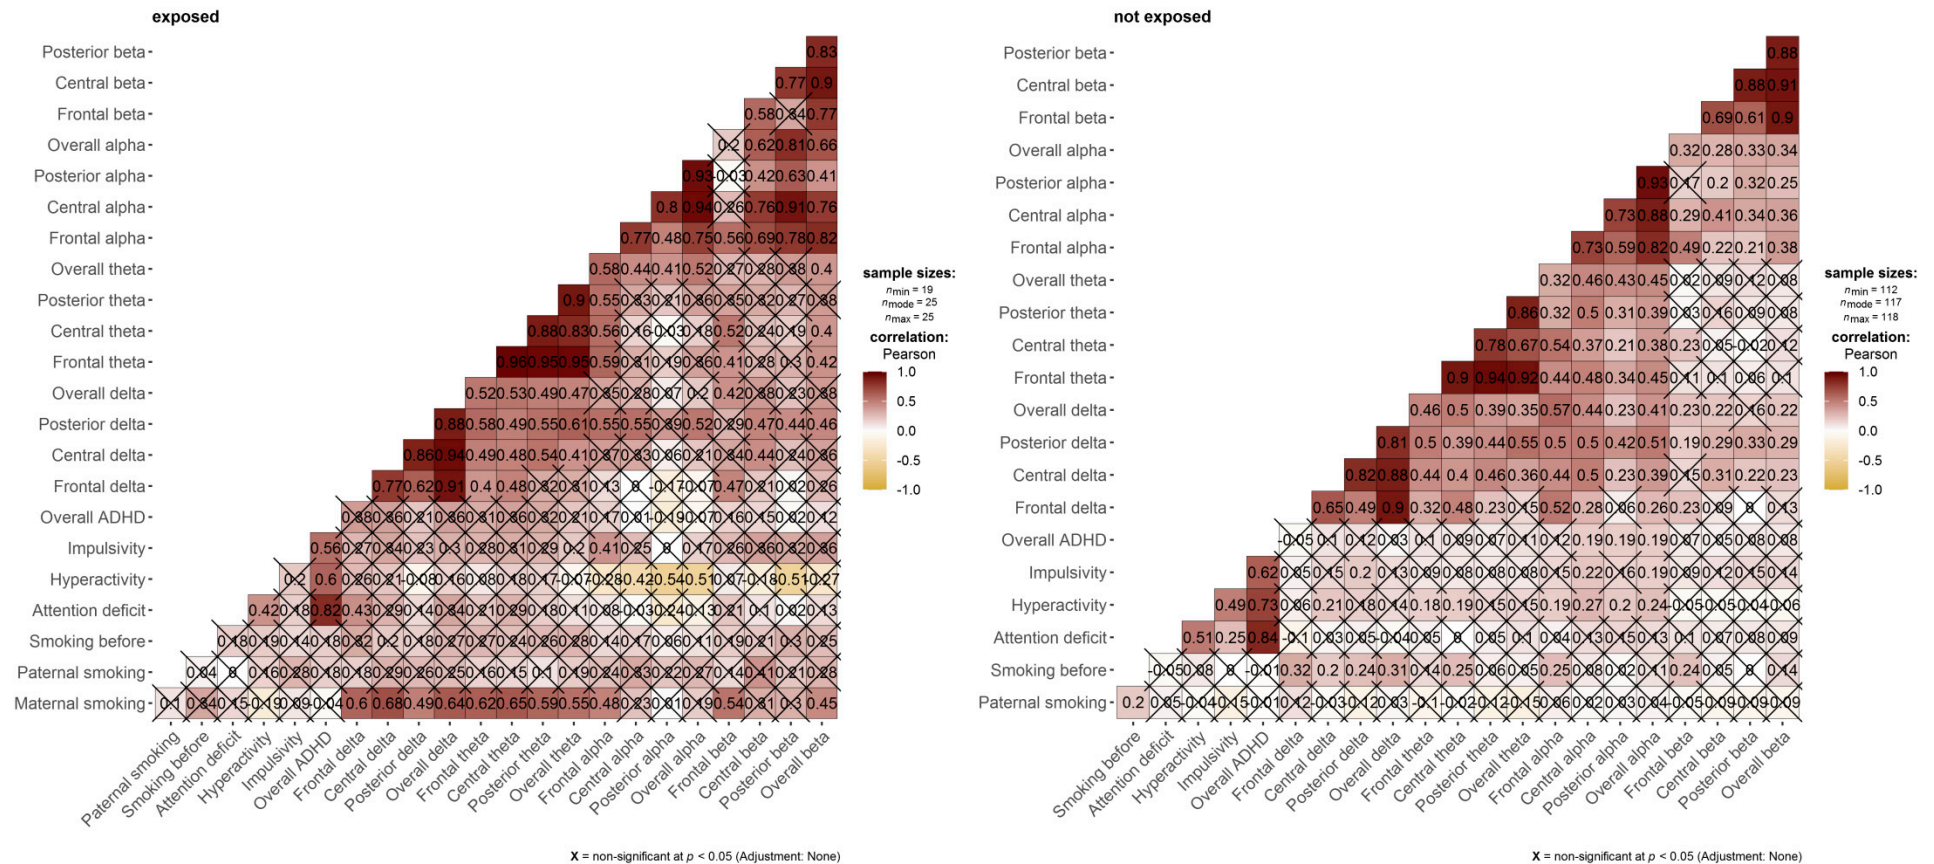

*Note.* X-non significant at  $p < 0.05$ , Parental smoking represents the averaged sum of weekly smoked cigarettes during pregnancy (Trimenon 1-3), analysis was performed for absolute power band data (Delta 0.5-3.5 Hz, Theta 3.5-7.5 Hz, Alpha 7.5-12.5 Hz, Beta 12.5-30 Hz)
